# Supplementary material for: Association of Coffee Consumption with Hearing and Tinnitus Based on a National Population-Based Survey
Source: Nutrients. 2018 Oct 4;10(10):1429. doi: 10.3390/nu10101429 (PMC6213338; doi:10.3390/nu10101429)
Supplement: Supplementary file 1 [file nutrients-10-01429-s001.pdf]

## Supplementary Tables

**Table S1.** Characteristics of study subjects in KNHANES (2009–2012) by coffee consumption and age group (19–39).

|                                                   | Coffee consumption |                 |                 |                 |                  | P-<br>value <sup>1)</sup> |
|---------------------------------------------------|--------------------|-----------------|-----------------|-----------------|------------------|---------------------------|
|                                                   | Total              | None            | Monthly         | Weekly          | Daily            |                           |
|                                                   | (n=4633)           | (n=634)         | (n=304)         | (n=873)         | (N=2822)         |                           |
| Age group (19–39)                                 |                    |                 |                 |                 |                  |                           |
| Age (year), median [IQR]                          | 32 [26, 36]        | 29 [24, 34]     | 28 [23, 33]     | 29 [24, 34]     | 34 [29, 37]      | <.0001                    |
| Male, n (%)                                       | 1739<br>(37.54%)   | 223<br>(35.17%) | 96 (31.58%)     | 334<br>(38.26%) | 1086<br>(38.48%) | 0.0597                    |
| Education, n (%)                                  |                    |                 |                 |                 |                  | <.0001                    |
| Less than middle school                           | 34 (0.73%)         | 6 (0.95%)       | 3 (0.99%)       | 4 (0.46%)       | 21 (0.74%)       |                           |
| High school                                       | 1225<br>(26.44%)   | 142<br>(22.40%) | 56 (18.42%)     | 189<br>(21.65%) | 838<br>(29.70%)  |                           |
| College or more                                   | 3374<br>(72.83%)   | 486<br>(76.66%) | 245<br>(80.59%) | 680<br>(77.89%) | 1963<br>(69.56%) |                           |
| Father’s education, n (%)                         |                    |                 |                 |                 |                  | <.0001                    |
| Less than middle school                           | 2002<br>(43.21%)   | 237<br>(37.38%) | 102<br>(33.55%) | 319<br>(36.54%) | 1344<br>(47.63%) |                           |
| High school                                       | 1592<br>(34.36%)   | 234<br>(36.91%) | 130<br>(42.76%) | 325<br>(37.23%) | 903<br>(32.00%)  |                           |
| College or more                                   | 935<br>(20.18%)    | 149<br>(23.50%) | 70 (23.03%)     | 214<br>(24.51%) | 502<br>(17.79%)  |                           |
| No/non-formal education                           | 104 (2.24%)        | 14 (2.21%)      | 2 (0.66%)       | 15 (1.72%)      | 73 (2.59%)       |                           |
| Mother’s education, n (%)                         |                    |                 |                 |                 |                  | <.0001                    |
| Less than middle school                           | 2463<br>(53.16%)   | 293<br>(46.21%) | 127<br>(41.78%) | 395<br>(45.25%) | 1648<br>(58.4%)  |                           |
| High school                                       | 1538<br>(33.2%)    | 245<br>(38.64%) | 137<br>(45.07%) | 341<br>(39.06%) | 815<br>(28.88%)  |                           |
| College or more                                   | 421 (9.09%)        | 73 (11.51%)     | 34 (11.18%)     | 109<br>(12.49%) | 205 (7.26%)      |                           |
| No/non-formal education                           | 211 (4.55%)        | 23 (3.63%)      | 6 (1.97%)       | 28 (3.21%)      | 154 (5.46%)      |                           |
| Monthly house income <sup>2)</sup> , median [IQR] | 333 [250, 500]     | 333 [208, 485]  | 333 [208, 500]  | 340 [247, 500]  | 348 [250, 500]   | 0.0072                    |
| Sleeping duration (hours), n (%)                  |                    |                 |                 |                 |                  | <.0001                    |
| < 6                                               | 307 (6.63%)        | 46 (7.26%)      | 18 (5.92%)      | 58 (6.64%)      | 185 (6.56%)      |                           |
| 6–7                                               | 1127<br>(24.33%)   | 118<br>(18.61%) | 63 (20.72%)     | 213<br>(24.40%) | 733<br>(25.97%)  |                           |
| 7–8                                               | 1465<br>(31.62%)   | 156<br>(24.61%) | 87 (28.62%)     | 268<br>(30.70%) | 954<br>(33.81%)  |                           |

|                                             |                  |                 |                 |                 |                  |        |
|---------------------------------------------|------------------|-----------------|-----------------|-----------------|------------------|--------|
| ≥8                                          | 1734<br>(37.43%) | 314<br>(49.53%) | 136<br>(44.74%) | 334<br>(38.26%) | 950<br>(33.66%)  |        |
| High perceived stress, n (%)                | 1483<br>(32.01%) | 200<br>(31.55%) | 80 (26.32%)     | 277<br>(31.73%) | 926<br>(32.81%)  | 0.1381 |
| Exposure to indoor secondhand smoke         |                  |                 |                 |                 |                  |        |
| At work, n (%)                              | 344 (7.42%)      | 32 (5.05%)      | 11 (3.62%)      | 60 (6.87%)      | 241 (8.54%)      | 0.0004 |
| At home, n (%)                              | 87 (1.88%)       | 10 (1.58%)      | 7 (2.30%)       | 20 (2.29%)      | 50 (1.77%)       | 0.6202 |
| Current smoking, n (%)                      | 1069<br>(23.07%) | 88 (13.88%)     | 42 (13.82%)     | 186<br>(21.31%) | 753<br>(26.68%)  | <.0001 |
| Heavy drinking <sup>3)</sup> , n (%)        | 757<br>(16.34%)  | 80 (12.62%)     | 31 (10.20%)     | 129<br>(14.78%) | 517<br>(18.32%)  | <.0001 |
| Difficulties controlling alcohol use, n (%) | 374 (8.07%)      | 52 (8.20%)      | 12 (3.95%)      | 76 (8.71%)      | 234 (8.29%)      | 0.035  |
| Having drinking-related problems, n (%)     | 340 (7.34%)      | 46 (7.26%)      | 13 (4.28%)      | 73 (8.36%)      | 208 (7.37%)      | 0.1203 |
| Menopause (females)                         |                  |                 |                 |                 |                  | 0.1577 |
| No                                          | 2888<br>(99.79%) | 411 (100%)      | 208 (100%)      | 538<br>(99.81%) | 1731<br>(99.71%) |        |
| Yes                                         | 6 (0.21%)        | 0 (0%)          | 0 (0%)          | 1 (0.19%)       | 5 (0.29%)        |        |
| Hypertension, n (%)                         | 48 (1.04%)       | 13 (2.05%)      | 1 (0.33%)       | 9 (1.03%)       | 25 (0.89%)       | 0.0582 |
| Diabetes mellitus, n (%)                    | 25 (0.54%)       | 6 (0.95%)       | 2 (0.66%)       | 3 (0.34%)       | 14 (0.5%)        | 0.3788 |
| Anemia, n (%)                               | 391 (8.69%)      | 53 (8.69%)      | 29 (9.83%)      | 62 (7.36%)      | 247 (8.98%)      | 0.4375 |
| Kidney failure, n (%)                       | 1 (0.02%)        | 0 (0.00%)       | 0 (0.00%)       | 0 (0.00%)       | 1 (0.04%)        | >.9999 |
| Thyroid disorder, n (%)                     | 50 (1.08%)       | 7 (1.1%)        | 3 (0.99%)       | 11 (1.26%)      | 29 (1.03%)       | 0.9271 |
| Tympanic membrane perforation, n (%)        | 29 (0.63%)       | 2 (0.32%)       | 1 (0.33%)       | 4 (0.46%)       | 22 (0.78%)       | 0.5564 |
| Cholesteatoma, n (%)                        | 36 (0.78%)       | 4 (0.63%)       | 2 (0.66%)       | 7 (0.8%)        | 23 (0.82%)       | 0.9825 |
| Otitis media with effusion, n (%)           | 17 (0.37%)       | 0 (0.00%)       | 1 (0.33%)       | 2 (0.23%)       | 14 (0.5%)        | 0.2531 |

1) P-values from Fisher exact tests (binary covariates), chi-square tests (>3 categories) and Wilcoxon rank-sum tests (continuous covariates); 2) Monthly household income (10,000 Korean Won); 3) Heavy drinking: more than 3 drinks per average and more than twice weekly.

**Table S2.** Characteristics of study subjects in KNHANES (2009–2012) by coffee consumption and age group (40–64).

|                          | Coffee consumption |                 |                    |                   |                   | P-value <sup>1)</sup> |
|--------------------------|--------------------|-----------------|--------------------|-------------------|-------------------|-----------------------|
|                          | Total<br>(n=6631)  | None<br>(n=656) | Monthly<br>(n=308) | Weekly<br>(n=899) | Daily<br>(N=4768) |                       |
| <b>Age group (40–64)</b> |                    |                 |                    |                   |                   |                       |
| Age (year), median [IQR] | 51 [45, 58]        | 55 [49, 60]     | 54 [47, 60]        | 53 [47, 58]       | 51 [45, 57]       | <.0001                |
| Male, n (%)              | 2749 (41.46%)      | 199 (30.34%)    | 113 (36.69%)       | 334 (37.15%)      | 2103 (44.11%)     | <.0001                |

|                                                   |                |                |                |                |                |        |
|---------------------------------------------------|----------------|----------------|----------------|----------------|----------------|--------|
| Education, n (%)                                  |                |                |                |                |                | <.0001 |
| Less than middle school                           | 2145 (32.35%)  | 285 (43.45%)   | 123 (39.94%)   | 333 (37.04%)   | 1404 (29.45%)  |        |
| High school                                       | 2484 (37.46%)  | 220 (33.54%)   | 105 (34.09%)   | 306 (34.04%)   | 1853 (38.86%)  |        |
| College or more                                   | 2002 (30.19%)  | 151 (23.02%)   | 80 (25.97%)    | 260 (28.92%)   | 1511 (31.69%)  |        |
| Father's education, n (%)                         |                |                |                |                |                | <.0001 |
| Less than middle school                           | 3510 (52.93%)  | 314 (47.87%)   | 167 (54.22%)   | 453 (50.39%)   | 2576 (54.03%)  |        |
| High school                                       | 956 (14.42%)   | 97 (14.79%)    | 31 (10.06%)    | 111 (12.35%)   | 717 (15.04%)   |        |
| College or more                                   | 529 (7.98%)    | 50 (7.62%)     | 16 (5.19%)     | 72 (8.01%)     | 391 (8.20%)    |        |
| No/non-formal education                           | 1636 (24.67%)  | 195 (29.73%)   | 94 (30.52%)    | 263 (29.25%)   | 1084 (22.73%)  |        |
| Mother's education, n (%)                         |                |                |                |                |                | <.0001 |
| Less than middle school                           | 3813 (57.50%)  | 335 (51.07%)   | 175 (56.82%)   | 487 (54.17%)   | 2816 (59.06%)  |        |
| High school                                       | 439 (6.62%)    | 25 (3.81%)     | 15 (4.87%)     | 39 (4.34%)     | 360 (7.55%)    |        |
| College or more                                   | 112 (1.69%)    | 13 (1.98%)     | 4 (1.30%)      | 22 (2.45%)     | 73 (1.53%)     |        |
| No/non-formal education                           | 2267 (34.19%)  | 283 (43.14%)   | 114 (37.01%)   | 351 (39.04%)   | 1519 (31.86%)  |        |
| Monthly house income <sup>4)</sup> , median [IQR] | 333 [200, 500] | 300 [150, 500] | 300 [167, 495] | 325 [183, 500] | 350 [208, 535] | <.0001 |
| Sleeping duration (hours), n (%)                  |                |                |                |                |                | 0.0422 |
| < 6                                               | 840 (12.67%)   | 109 (16.62%)   | 45 (14.61%)    | 126 (14.02%)   | 560 (11.74%)   |        |
| 6–7                                               | 1888 (28.47%)  | 172 (26.22%)   | 85 (27.60%)    | 256 (28.48%)   | 1375 (28.84%)  |        |
| 7–8                                               | 2054 (30.98%)  | 187 (28.51%)   | 93 (30.19%)    | 268 (29.81%)   | 1506 (31.59%)  |        |
| ≥8                                                | 1849 (27.88%)  | 188 (28.66%)   | 85 (27.60%)    | 249 (27.7%)    | 1327 (27.83%)  |        |
| High perceived stress, n (%)                      | 1676 (25.28%)  | 172 (26.22%)   | 77 (25.00%)    | 217 (24.14%)   | 1210 (25.38%)  | 0.8117 |
| Exposure to indoor secondhand smoke               |                |                |                |                |                |        |
| At work, n (%)                                    | 481 (7.25%)    | 30 (4.57%)     | 8 (2.60%)      | 55 (6.12%)     | 388 (8.14%)    | <.0001 |
| At home, n (%)                                    | 138 (2.08%)    | 13 (1.98%)     | 3 (0.97%)      | 20 (2.22%)     | 102 (2.14%)    | 0.5959 |
| Current smoking, n (%)                            | 1232 (18.58%)  | 58 (8.84%)     | 19 (6.17%)     | 135 (15.02%)   | 1020 (21.39%)  | <.0001 |

|                                                   |               |              |              |              |               |        |
|---------------------------------------------------|---------------|--------------|--------------|--------------|---------------|--------|
| Heavy drinking <sup>5)</sup> ,<br>n (%)           | 1309 (19.74%) | 85 (12.96%)  | 47 (15.26%)  | 173 (19.24%) | 1004 (21.06%) | <.0001 |
| Difficulties<br>controlling<br>alcohol use, n (%) | 610 (9.20%)   | 49 (7.47%)   | 28 (9.09%)   | 93 (10.34%)  | 440 (9.23%)   | 0.2844 |
| Having drinking-<br>related problems,<br>n (%)    | 379 (5.72%)   | 29 (4.42%)   | 17 (5.52%)   | 60 (6.67%)   | 273 (5.73%)   | 0.3091 |
| Menopause<br>(females)                            |               |              |              |              |               | <.0001 |
| No                                                | 1801 (46.39%) | 144 (31.51%) | 68 (34.87%)  | 226 (40.00%) | 1363 (51.14%) |        |
| Yes                                               | 2081 (53.61%) | 313 (68.49%) | 127 (65.13%) | 339 (60.00%) | 1302 (48.86%) |        |
| Hypertension, n<br>(%)                            | 1257 (18.96%) | 161 (24.54%) | 67 (21.75%)  | 182 (20.24%) | 847 (17.76%)  | 0.0002 |
| Diabetes<br>mellitus, n (%)                       | 467 (7.04%)   | 71 (10.82%)  | 27 (8.77%)   | 68 (7.56%)   | 301 (6.31%)   | 0.0003 |
| Anemia, n (%)                                     | 546 (8.46%)   | 60 (9.66%)   | 17 (5.74%)   | 73 (8.45%)   | 396 (8.47%)   | 0.2566 |
| Kidney failure, n<br>(%)                          | 17 (0.26%)    | 4 (0.61%)    | 1 (0.32%)    | 6 (0.67%)    | 6 (0.13%)     | 0.0043 |
| Thyroid disorder,<br>n (%)                        | 182 (2.74%)   | 29 (4.42%)   | 12 (3.90%)   | 28 (3.11%)   | 113 (2.37%)   | 0.0106 |
| Tympanic<br>membrane<br>perforation, n (%)        | 147 (2.22%)   | 19 (2.90%)   | 6 (1.95%)    | 27 (3.00%)   | 95 (1.99%)    | 0.1538 |
| Cholesteatoma, n<br>(%)                           | 141 (2.13%)   | 19 (2.90%)   | 5 (1.62%)    | 17 (1.89%)   | 100 (2.10%)   | 0.5032 |
| Otitis media with<br>effusion, n (%)              | 35 (0.53%)    | 7 (1.07%)    | 0 (0.00%)    | 2 (0.22%)    | 26 (0.55%)    | 0.0993 |

1) P-values from Fisher exact test (binary covariates), chi-square test (>3 categories) and Wilcoxon rank-sum test (continuous covariates); 2) Monthly household income (10,000 Korean Won); 3) Heavy drinking: more than 3 drinks on average and more than twice weekly.

**Table S3.** Characteristics of study subjects in KNHANES (2009–2012) by coffee consumption and age group (≥65).

|                             | Coffee consumption |                 |                    |                   |                   | P-value <sup>1)</sup> |
|-----------------------------|--------------------|-----------------|--------------------|-------------------|-------------------|-----------------------|
|                             | Total<br>(n=2184)  | None<br>(n=429) | Monthly<br>(n=122) | Weekly<br>(n=383) | Daily<br>(N=1250) |                       |
| <b>Age group (≥65)</b>      |                    |                 |                    |                   |                   |                       |
| Age (year),<br>median [IQR] | 71 [68, 75]        | 72 [68, 76]     | 72 [68, 75]        | 71 [68, 75]       | 71 [68, 75]       | 0.0173                |
| Male, n (%)                 | 1040 (47.62%)      | 145 (33.80%)    | 43 (35.25%)        | 173 (45.17%)      | 679 (54.32%)      | <.0001                |
| Education, n (%)            |                    |                 |                    |                   |                   | <.0001                |

|                                                   |               |              |              |               |               |        |
|---------------------------------------------------|---------------|--------------|--------------|---------------|---------------|--------|
| Less than middle school                           | 1632 (74.73%) | 362 (84.38%) | 93 (76.23%)  | 296 (77.28%)  | 881 (70.48%)  |        |
| High school                                       | 345 (15.80%)  | 41 (9.56%)   | 23 (18.85%)  | 53 (13.84%)   | 228 (18.24%)  |        |
| College or more                                   | 207 (9.48%)   | 26 (6.06%)   | 6 (4.92%)    | 34 (8.88%)    | 141 (11.28%)  |        |
| Father's education, n (%)                         |               |              |              |               |               | 0.4676 |
| Less than middle school                           | 661 (30.27%)  | 127 (29.60%) | 31 (25.41%)  | 106 (27.68%)  | 397 (31.76%)  |        |
| High school                                       | 103 (4.72%)   | 23 (5.36%)   | 7 (5.74%)    | 13 (3.39%)    | 60 (4.80%)    |        |
| College or more                                   | 60 (2.75%)    | 12 (2.80%)   | 4 (3.28%)    | 7 (1.83%)     | 37 (2.96%)    |        |
| No/non-formal education                           | 1360 (62.27%) | 267 (62.24%) | 80 (65.57%)  | 257 (67.10%)  | 756 (60.48%)  |        |
| Mother's education, n (%)                         |               |              |              |               |               | 0.4415 |
| Less than middle school                           | 477 (21.84%)  | 82 (19.11%)  | 24 (19.67%)  | 84 (21.93%)   | 287 (22.96%)  |        |
| High school                                       | 31 (1.42%)    | 8 (1.86%)    | 2 (1.64%)    | 2 (0.52%)     | 19 (1.52%)    |        |
| College or more                                   | 7 (0.32%)     | 0 (0.00%)    | 0 (0.00%)    | 1 (0.26%)     | 6 (0.48%)     |        |
| No/non-formal education                           | 1669 (76.42%) | 339 (79.02%) | 96 (78.69%)  | 296 (77.28%)  | 938 (75.04%)  |        |
| Monthly house income <sup>4)</sup> , median [IQR] | 100 [54, 233] | 95 [50, 200] | 87 [42, 270] | 100 [50, 225] | 108 [57, 250] | 0.0225 |
| Sleeping duration (hours), n (%)                  |               |              |              |               |               | 0.0031 |
| < 6                                               | 595 (27.24%)  | 144 (33.57%) | 43 (35.25%)  | 101 (26.37%)  | 307 (24.56%)  |        |
| 6–7                                               | 468 (21.43%)  | 95 (22.14%)  | 19 (15.57%)  | 90 (23.50%)   | 264 (21.12%)  |        |
| 7–8                                               | 513 (23.49%)  | 89 (20.75%)  | 23 (18.85%)  | 96 (25.07%)   | 305 (24.40%)  |        |
| ≥8                                                | 608 (27.84%)  | 101 (23.54%) | 37 (30.33%)  | 96 (25.07%)   | 374 (29.92%)  |        |
| High perceived stress, n (%)                      | 470 (21.52%)  | 109 (25.41%) | 29 (23.77%)  | 96 (25.07%)   | 236 (18.88%)  | 0.0063 |
| Exposure to indoor secondhand smoke               |               |              |              |               |               |        |
| At work, n (%)                                    | 42 (1.92%)    | 7 (1.63%)    | 7 (5.74%)    | 5 (1.31%)     | 23 (1.84%)    | 0.0409 |
| At home, n (%)                                    | 24 (1.10%)    | 8 (1.86%)    | 1 (0.82%)    | 0 (0.00%)     | 15 (1.20%)    | 0.039  |
| Current smoking, n (%)                            | 272 (12.45%)  | 27 (6.29%)   | 6 (4.92%)    | 29 (7.57%)    | 210 (16.80%)  | <.0001 |
| Heavy drinking <sup>5)</sup> , n (%)              | 293 (13.42%)  | 32 (7.46%)   | 15 (12.30%)  | 51 (13.32%)   | 195 (15.60%)  | 0.0002 |

|                                                   |               |              |             |              |              |        |
|---------------------------------------------------|---------------|--------------|-------------|--------------|--------------|--------|
| Difficulties<br>controlling alcohol<br>use, n (%) | 106 (4.85%)   | 11 (2.56%)   | 2 (1.64%)   | 21 (5.48%)   | 72 (5.76%)   | 0.013  |
| Having drinking-<br>related problems,<br>n (%)    | 38 (1.74%)    | 3 (0.70%)    | 0 (0.00%)   | 8 (2.09%)    | 27 (2.16%)   | 0.0868 |
| Menopause<br>(females)                            |               |              |             |              |              | <.0001 |
| No                                                | 21 (1.84%)    | 4 (1.41%)    | 2 (2.53%)   | 5 (2.38%)    | 10 (1.75%)   |        |
| Yes                                               | 1123 (98.16%) | 280 (98.59%) | 77 (97.47%) | 205 (97.62%) | 561 (98.25%) |        |
| Hypertension, n<br>(%)                            | 1089 (49.86%) | 219 (51.05%) | 63 (51.64%) | 197 (51.44%) | 610 (48.80%) | 0.7205 |
| Diabetes mellitus,<br>n (%)                       | 406 (18.59%)  | 87 (20.28%)  | 23 (18.85%) | 81 (21.15%)  | 215 (17.20%) | 0.2445 |
| Anemia, n (%)                                     | 243 (12.14%)  | 49 (13.42%)  | 12 (10.91%) | 46 (12.96%)  | 136 (11.60%) | 0.7352 |
| Kidney failure, n<br>(%)                          | 14 (0.64%)    | 3 (0.70%)    | 0 (0.00%)   | 4 (1.04%)    | 7 (0.56%)    | 0.6653 |
| Thyroid disorder,<br>n (%)                        | 45 (2.06%)    | 14 (3.26%)   | 4 (3.28%)   | 8 (2.09%)    | 19 (1.52%)   | 0.0949 |
| Tympanic<br>membrane<br>perforation, n (%)        | 92 (4.21%)    | 23 (5.36%)   | 2 (1.64%)   | 15 (3.92%)   | 52 (4.16%)   | 0.3396 |
| Cholesteatoma, n<br>(%)                           | 58 (2.66%)    | 15 (3.50%)   | 5 (4.10%)   | 6 (1.57%)    | 32 (2.56%)   | 0.2376 |
| Otitis media with<br>effusion, n (%)              | 11 (0.50%)    | 2 (0.47%)    | 0 (0.00%)   | 2 (0.52%)    | 7 (0.56%)    | >.9999 |

1) P-values from Fisher exact test (binary covariates), chi-square test (>3 categories) and Wilcoxon rank-sum test (continuous covariates); 2) Monthly household income (10,000 Korean Won); 3) Heavy drinking: more than 3 drinks on average and more than twice weekly.

**Table S4.** Degree of unilateral hearing loss by coffee consumption.

|                          | Frequency of coffee consumption |            |            |             |             |
|--------------------------|---------------------------------|------------|------------|-------------|-------------|
|                          | Total                           | Rarely     | Monthly    | Weekly      | Daily       |
| <b>Age group (19-39)</b> |                                 |            |            |             |             |
| More than mild           | 150 (3.2%)                      | 21 (3.3%)  | 11 (3.6%)  | 21 (2.4%)   | 97 (3.4%)   |
| More than moderate       | 55 (1.2%)                       | 11 (1.7%)  | 2 (0.7%)   | 6 (0.7%)    | 36 (1.3%)   |
| More than severe         | 25 (0.5%)                       | 3 (0.5%)   | 1 (0.3%)   | 3 (0.3%)    | 18 (0.6%)   |
| Profound                 | 3 (0.1%)                        | 0 (0.0%)   | 0 (0.0%)   | 0 (0.0%)    | 3 (0.1%)    |
| Total                    | 4633                            | 634        | 304        | 873         | 2822        |
| <b>Age group (40-64)</b> |                                 |            |            |             |             |
| More than mild           | 673 (10.1%)                     | 67 (10.2%) | 21 (6.8%)  | 106 (11.8%) | 479 (10.0%) |
| More than moderate       | 332 (5.0%)                      | 40 (6.1%)  | 15 (4.9%)  | 47 (5.2%)   | 230 (4.8%)  |
| More than severe         | 94 (1.4%)                       | 22 (3.4%)  | 8 (2.6%)   | 7 (0.8%)    | 57 (1.2%)   |
| Profound                 | 30 (0.5%)                       | 6 (0.9%)   | 0 (0.0%)   | 4 (0.4%)    | 20 (0.4%)   |
| Total                    | 6631                            | 656        | 308        | 899         | 4768        |
| <b>Age group (≥65)</b>   |                                 |            |            |             |             |
| More than mild           | 320 (14.7%)                     | 70 (16.3%) | 24 (19.7%) | 59 (15.4%)  | 167 (13.4%) |
| More than moderate       | 311 (14.2%)                     | 71 (16.6%) | 18 (14.8%) | 58 (15.1%)  | 164 (13.1%) |
| More than severe         | 97 (4.4%)                       | 19 (4.4%)  | 6 (4.9%)   | 17 (4.4%)   | 55 (4.4%)   |
| Profound                 | 37 (1.7%)                       | 8 (1.9%)   | 1 (0.8%)   | 4 (1.0%)    | 24 (1.9%)   |
| Total                    | 2184                            | 429        | 122        | 383         | 1250        |

**Table S5.** Degree of bilateral hearing loss by coffee consumption.

|                          | Frequency of coffee consumption |             |            |             |             |
|--------------------------|---------------------------------|-------------|------------|-------------|-------------|
|                          | Total                           | Rarely      | Monthly    | Weekly      | Daily       |
| <b>Age group (19-39)</b> |                                 |             |            |             |             |
| More than mild           | 45 (1.0%)                       | 6 (1.0%)    | 0 (0.0%)   | 8 (0.9%)    | 31 (1.1%)   |
| More than moderate       | 8 (0.2%)                        | 1 (0.2%)    | 0 (0.0%)   | 3 (0.3%)    | 4 (0.1%)    |
| More than severe         | 1 (0.0%)                        | 0 (0.0%)    | 0 (0.0%)   | 0 (0.0%)    | 1 (0.0%)    |
| Profound                 | 0                               | -           | -          | -           | -           |
| Total                    | 4633                            | 634         | 304        | 873         | 2822        |
| <b>Age group (40-64)</b> |                                 |             |            |             |             |
| More than mild           | 854 (12.9%)                     | 113 (17.2%) | 47 (15.3%) | 119 (13.2%) | 575 (12.1%) |
| More than moderate       | 192 (2.9%)                      | 31 (4.7%)   | 18 (5.8%)  | 33 (3.7%)   | 110 (2.3%)  |
| More than severe         | 26 (0.4%)                       | 3 (0.5%)    | 2 (0.7%)   | 7 (0.8%)    | 14 (0.3%)   |
| Profound                 | 9 (0.1%)                        | 1 (0.2%)    | 0 (0.0%)   | 3 (0.3%)    | 5 (0.1%)    |
| Total                    | 6631                            | 656         | 308        | 899         | 4768        |
| <b>Age group (≥65)</b>   |                                 |             |            |             |             |
| More than mild           | 1259 (57.6%)                    | 246 (57.3%) | 70 (57.4%) | 216 (56.4%) | 727 (58.2%) |
| More than moderate       | 458 (21.0%)                     | 99 (23.1%)  | 20 (16.4%) | 79 (20.6%)  | 260 (20.8%) |
| More than severe         | 58 (2.7%)                       | 16 (3.7%)   | 3 (2.5%)   | 13 (3.4%)   | 26 (2.1%)   |
| Profound                 | 29 (1.3%)                       | 9 (2.1%)    | 0 (0.0%)   | 8 (2.1%)    | 12 (1.0%)   |
| Total                    | 2184                            | 429         | 122        | 383         | 1250        |

**Table S6.** Odds ratio and 95% confidence intervals by coffee consumption for degree of unilateral hearing loss.

|                            |         | Mild                 |         | Moderate             |         | Severe               |         | Profound             |         |
|----------------------------|---------|----------------------|---------|----------------------|---------|----------------------|---------|----------------------|---------|
|                            |         | OR (95% CI)          | P-value |
| <b>Age 19-39</b>           |         |                      |         |                      |         |                      |         |                      |         |
| Univariable                | Rarely  | reference            |         | reference            |         | reference            |         |                      |         |
|                            | Monthly | 1.10<br>(0.52, 2.30) | 0.8090  | 0.38<br>(0.08, 1.70) | 0.2039  | 0.69<br>(0.07, 6.70) | 0.7523  |                      |         |
|                            | Weekly  | 0.72<br>(0.39, 1.33) | 0.2931  | 0.39<br>(0.14, 1.07) | 0.0664  | 0.73<br>(0.15, 3.61) | 0.6946  | - <sup>1)</sup>      |         |
|                            | Daily   | 1.04<br>(0.64, 1.68) | 0.8756  | 0.73<br>(0.37, 1.45) | 0.3688  | 1.35<br>(0.40, 4.60) | 0.6310  |                      |         |
|                            |         |                      |         |                      |         |                      |         |                      |         |
| Multivariable <sup>2</sup> | Rarely  | Reference            |         | reference            |         | reference            |         |                      |         |
|                            | Monthly | 0.92<br>(0.42, 2.01) | 0.8424  | 0.42<br>(0.09, 1.99) | 0.2768  | 0.95<br>(0.19, 4.83) | 0.9495  |                      |         |
|                            | Weekly  | 0.62<br>(0.33, 1.18) | 0.1434  | 0.45<br>(0.16, 1.28) | 0.1338  | 0.72<br>(0.21, 2.49) | 0.6058  | -                    |         |
|                            | Daily   | 0.92<br>(0.56, 1.51) | 0.7409  | 0.76<br>(0.36, 1.59) | 0.4595  | 1.13<br>(0.42, 3.03) | 0.8048  |                      |         |
|                            |         |                      |         |                      |         |                      |         |                      |         |
| <b>Age 40-64</b>           |         |                      |         |                      |         |                      |         |                      |         |
| Univariable                | Rarely  | Reference            |         | reference            |         | reference            |         | reference            |         |
|                            | Monthly | 0.64<br>(0.39, 1.07) | 0.0900  | 0.79<br>(0.43, 1.45) | 0.4442  | 0.77<br>(0.34, 1.75) | 0.5294  | 0.16<br>(0.01, 2.90) | 0.2164  |
|                            | Weekly  | 1.18<br>(0.85, 1.63) | 0.3290  | 0.85<br>(0.55, 1.31) | 0.4611  | 0.23<br>(0.10, 0.53) | 0.0007  | 0.50<br>(0.15, 1.68) | 0.2643  |
|                            | Daily   | 0.98<br>(0.75, 1.29) | 0.8938  | 0.78<br>(0.55, 1.10) | 0.1603  | 0.35<br>(0.21, 0.57) | <.0001  | 0.43<br>(0.18, 1.05) | 0.0636  |
|                            |         |                      |         |                      |         |                      |         |                      |         |
| Multivariable              | Rarely  | reference            |         | reference            |         | reference            |         | reference            |         |
|                            |         |                      |         |                      |         |                      |         |                      |         |

|  |             |                         |            |                         |            |                         |            |                         |            |
|--|-------------|-------------------------|------------|-------------------------|------------|-------------------------|------------|-------------------------|------------|
|  | Monthl<br>y | 0.74<br>(0.44,<br>1.25) | 0.259<br>9 | 0.80<br>(0.42,<br>1.52) | 0.489<br>1 | 0.83<br>(0.36,<br>1.93) | 0.666<br>7 | 0.14<br>(0.01,<br>1.73) | 0.126<br>4 |
|  | Weekly      | 1.32<br>(0.94,<br>1.86) | 0.114<br>6 | 0.86<br>(0.54,<br>1.36) | 0.514<br>1 | 0.25<br>(0.10,<br>0.59) | 0.001<br>7 | 0.52<br>(0.18,<br>1.47) | 0.217<br>8 |
|  | Daily       | 1.17<br>(0.87,<br>1.56) | 0.303<br>9 | 0.85<br>(0.59,<br>1.23) | 0.386<br>5 | 0.38<br>(0.22,<br>0.64) | 0.000<br>3 | 0.44<br>(0.20,<br>0.96) | 0.039<br>9 |

#### Age ≥65

| Univariable | Rarely      | reference               |            | referenc<br>e           |            | referenc<br>e           |            | referenc<br>e           |            |
|-------------|-------------|-------------------------|------------|-------------------------|------------|-------------------------|------------|-------------------------|------------|
|             | Monthl<br>y | 1.26<br>(0.75,<br>2.10) | 0.384<br>0 | 0.87<br>(0.50,<br>1.53) | 0.634<br>4 | 1.12<br>(0.44,<br>2.86) | 0.818<br>9 | 0.44<br>(0.05,<br>3.51) | 0.434<br>7 |
|             | Weekly      | 0.93<br>(0.64,<br>1.36) | 0.722<br>6 | 0.90<br>(0.62,<br>1.31) | 0.584<br>1 | 1.00<br>(0.51,<br>1.96) | 0.994<br>6 | 0.56<br>(0.17,<br>1.86) | 0.340<br>1 |
|             | Daily       | 0.79<br>(0.58,<br>1.07) | 0.129<br>7 | 0.76<br>(0.56,<br>1.03) | 0.077<br>8 | 0.99<br>(0.58,<br>1.69) | 0.979<br>9 | 1.03<br>(0.46,<br>2.31) | 0.942<br>5 |

| Multivariable | Rarely      | reference               |            | referenc<br>e           |            | referenc<br>e           |            | referenc<br>e           |            |
|---------------|-------------|-------------------------|------------|-------------------------|------------|-------------------------|------------|-------------------------|------------|
|               | Monthl<br>y | 1.06<br>(0.61,<br>1.86) | 0.825<br>9 | 0.89<br>(0.48,<br>1.66) | 0.707<br>0 | 1.20<br>(0.45,<br>3.17) | 0.721<br>1 | 0.54<br>(0.11,<br>2.55) | 0.433<br>7 |
|               | Weekly      | 0.84<br>(0.56,<br>1.26) | 0.393<br>4 | 0.97<br>(0.64,<br>1.47) | 0.876<br>5 | 0.77<br>(0.36,<br>1.62) | 0.485<br>0 | 0.52<br>(0.17,<br>1.59) | 0.252<br>9 |
|               | Daily       | 0.78<br>(0.56,<br>1.08) | 0.126<br>9 | 0.85<br>(0.60,<br>1.19) | 0.336<br>0 | 0.88<br>(0.50,<br>1.58) | 0.673<br>1 | 0.81<br>(0.38,<br>1.74) | 0.591<br>9 |

1) Analysis was not performed because of less than 5 hearing losses of the definition.

2) Adjusted for age, sex, education, parents' education, perceived stress, exposure to indoor secondhand smoke, current smoking, heavy drinking, drinking-related problem, menopause, history of hypertension, diabetes mellitus, anemia, kidney failure, thyroid disorder, tympanic membrane perforation, cholesteatoma and otitis media with effusion.

**Table S7.** Odds ratio and 95% confidence intervals by coffee consumption for degree of bilateral hearing loss.

|                            |         | Mild                 |             | Moderate              |             | Severe               |             | Profound              |             |
|----------------------------|---------|----------------------|-------------|-----------------------|-------------|----------------------|-------------|-----------------------|-------------|
|                            |         | OR<br>(95% CI)       | P-<br>value | OR<br>(95% CI)        | P-<br>value | OR<br>(95% CI)       | P-<br>value | OR<br>(95% CI)        | P-<br>value |
| <b>Age 19-39</b>           |         |                      |             |                       |             |                      |             |                       |             |
| Univariable                | Rarely  | reference            |             | reference             |             |                      |             |                       |             |
|                            | Monthly | 0.16<br>(0.01, 2.84) | 0.211<br>1  | 0.69<br>(0.03, 17.15) | 0.823<br>1  |                      |             |                       |             |
|                            | Weekly  | 0.95<br>(0.34, 2.65) | 0.921<br>4  | 1.70<br>(0.25, 11.55) | 0.588<br>0  | - <sup>1)</sup>      |             | -                     |             |
|                            | Daily   | 1.09<br>(0.47, 2.55) | 0.840<br>6  | 0.67<br>(0.11, 4.29)  | 0.676<br>5  |                      |             |                       |             |
| <hr/>                      |         |                      |             |                       |             |                      |             |                       |             |
| Multivariable <sup>2</sup> | Rarely  | reference            |             | reference             |             |                      |             |                       |             |
|                            | Monthly | 0.19<br>(0.02, 2.52) | 0.210<br>1  | 0.59<br>(0.06, 6.35)  | 0.665<br>6  |                      |             |                       |             |
|                            | Weekly  | 0.97<br>(0.36, 2.60) | 0.947<br>5  | 1.53<br>(0.37, 6.32)  | 0.560<br>7  | -                    |             | -                     |             |
|                            | Daily   | 0.90<br>(0.39, 2.11) | 0.815<br>3  | 0.74<br>(0.19, 2.94)  | 0.671<br>5  |                      |             |                       |             |
| <hr/>                      |         |                      |             |                       |             |                      |             |                       |             |
| <b>Age 40-64</b>           |         |                      |             |                       |             |                      |             |                       |             |
| Univariable                | Rarely  | reference            |             | reference             |             | reference            |             | reference             |             |
|                            | Monthly | 0.87<br>(0.60, 1.25) | 0.444<br>6  | 1.25<br>(0.69, 2.28)  | 0.460<br>4  | 1.42<br>(0.24, 8.56) | 0.700<br>2  | 0.71<br>(0.03, 17.52) | 0.833<br>1  |
|                            | Weekly  | 0.73<br>(0.55, 0.97) | 0.029<br>6  | 0.77<br>(0.47, 1.27)  | 0.302<br>3  | 1.71<br>(0.44, 6.63) | 0.439<br>1  | 1.71<br>(0.25, 11.60) | 0.584<br>9  |
|                            | Daily   | 0.66<br>(0.53, 0.82) | 0.000<br>2  | 0.48<br>(0.32, 0.72)  | 0.000<br>4  | 0.64<br>(0.18, 2.24) | 0.485<br>5  | 0.51<br>(0.08, 3.08)  | 0.458<br>4  |
| <hr/>                      |         |                      |             |                       |             |                      |             |                       |             |
| Multivariable <sup>1</sup> | Rarely  | reference            |             | reference             |             | reference            |             | reference             |             |
|                            |         | e                    |             | e                     |             | e                    |             | e                     |             |

|                            |         |                         |            |                         |            |                         |            |                         |            |
|----------------------------|---------|-------------------------|------------|-------------------------|------------|-------------------------|------------|-------------------------|------------|
|                            | Monthly | 0.82<br>(0.55,<br>1.24) | 0.353<br>2 | 1.19<br>(0.62,<br>2.27) | 0.605<br>1 | 1.00<br>(0.20,<br>5.09) | 0.999<br>9 | 0.88<br>(0.09,<br>8.41) | 0.910<br>5 |
|                            | Weekly  | 0.72<br>(0.53,<br>0.98) | 0.034<br>0 | 0.74<br>(0.43,<br>1.26) | 0.262<br>4 | 1.47<br>(0.50,<br>4.33) | 0.488<br>8 | 1.82<br>(0.45,<br>7.44) | 0.404<br>8 |
|                            | Daily   | 0.70<br>(0.55,<br>0.90) | 0.004<br>8 | 0.51<br>(0.33,<br>0.78) | 0.002<br>1 | 0.62<br>(0.23,<br>1.67) | 0.347<br>8 | 0.57<br>(0.15,<br>2.11) | 0.396<br>5 |
| <b>Age ≥65</b>             |         |                         |            |                         |            |                         |            |                         |            |
| Univariable                | Rarely  | reference               |            | reference               |            | reference               |            | reference               |            |
|                            | Monthly | 1.00<br>(0.67,<br>1.50) | 0.994<br>6 | 0.65<br>(0.39,<br>1.11) | 0.115<br>5 | 0.65<br>(0.19,<br>2.27) | 0.500<br>5 | 0.18<br>(0.01,<br>3.16) | 0.241<br>3 |
|                            | Weekly  | 0.96<br>(0.73,<br>1.27) | 0.784<br>9 | 0.87<br>(0.62,<br>1.21) | 0.399<br>7 | 0.91<br>(0.43,<br>1.91) | 0.797<br>2 | 1.00<br>(0.39,<br>2.56) | 0.996<br>7 |
|                            | Daily   | 1.03<br>(0.83,<br>1.29) | 0.767<br>5 | 0.88<br>(0.67,<br>1.14) | 0.321<br>2 | 0.55<br>(0.29,<br>1.03) | 0.062<br>7 | 0.45<br>(0.19,<br>1.05) | 0.063<br>7 |
| Multivariable <sup>1</sup> | Rarely  | reference               |            | reference               |            | reference               |            | reference               |            |
|                            | Monthly | 1.09<br>(0.70,<br>1.70) | 0.688<br>9 | 0.72<br>(0.40,<br>1.29) | 0.272<br>0 | 0.79<br>(0.26,<br>2.37) | 0.668<br>4 | 0.19<br>(0.02,<br>1.96) | 0.161<br>0 |
|                            | Weekly  | 1.06<br>(0.78,<br>1.44) | 0.698<br>6 | 0.90<br>(0.62,<br>1.31) | 0.595<br>3 | 0.82<br>(0.40,<br>1.69) | 0.589<br>1 | 0.92<br>(0.40,<br>2.12) | 0.842<br>5 |
|                            | Daily   | 1.06<br>(0.83,<br>1.36) | 0.625<br>8 | 0.84<br>(0.62,<br>1.14) | 0.266<br>9 | 0.37<br>(0.19,<br>0.69) | 0.002<br>0 | 0.27<br>(0.12,<br>0.60) | 0.001<br>4 |

1) Analysis was not performed because of less than 5 hearing losses of the definition.

2) Adjusted for age, sex, education, parents' education, perceived stress, exposure to indoor secondhand smoke, current smoking, heavy drinking, drinking-related problem, menopause, history of hypertension, diabetes mellitus, anemia, kidney failure, thyroid disorder, tympanic membrane perforation, cholesteatoma and otitis media with effusion.
